# Supplementary material
Source: Springer Nature journal article supplement (https://www.springermedizin.de/resource/supplementary/12960_2008_176_MOESM2_ESM.pdf/9570576)
Supplement: MOESM2 [file 9570576]

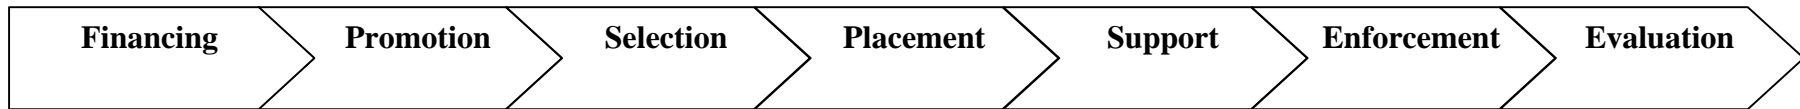

**Definition**

- Source of financing to pay for financial incentives and programme administration

- Promotion of programmes to attract candidates for participation

- Selection of participants out of the pool of candidates

- Placement of participants in medically underserved areas

- Ongoing contact with participants and support during all stages of enrolment

- Monitoring and enforcement of contract fulfilment

- Evaluation of programme performance

**Literature source**

- Donor-financed endowment funds

- Health risk reduction programmes

- Selective recruitment for health care education

- Compulsory service

- Financial-incentive programmes

- Educational loans

- Financial-incentive programmes
